# Supplementary material for: Detection of SARS-CoV-2 Virus by Triplex Enhanced Nucleic Acid Detection Assay (TENADA)
Source: MDPI journal article supplement (doi:10.3390/ijms232315258), 2022-12-03
Supplement: s1 [file s1]

## SUPPLEMENTARY MATERIAL

# Detection of SARS-CoV-2 virus by Triplex Enhanced Nucleic Acid Detection Assay (TENADA)

**Anna Aviñó<sup>1,2</sup>, Carlos Cuestas-Ayllón<sup>2,3</sup>, Manuel Gutiérrez-Capitán<sup>4</sup>, Luisa Vilaplana<sup>1,2</sup>, Valeria Grazu<sup>2,3</sup>, Véronique Noé<sup>5,6</sup>, Eva Balada<sup>1,2</sup>, Antonio Baldi<sup>4</sup>, Alex J. Félix<sup>5</sup>, Eva Aubets<sup>5</sup>, Simonas Valiuska<sup>5,6</sup>, Arnau Domínguez<sup>1,2</sup>, Raimundo Gargallo<sup>7</sup>, Ramon Eritja<sup>1,2,\*</sup>, M. Pilar Marco<sup>1,2</sup>, César Fernández-Sánchez<sup>2,4</sup>, Jesús Martínez de la Fuente<sup>2,3</sup>, Carlos J. Ciudad<sup>5,6</sup>**

<sup>1</sup> Institute for Advanced Chemistry of Catalonia (IQAC), Consejo Superior de Investigaciones Científicas (CSIC), Barcelona, 08034, Spain; aaagma@cid.csic.es; lvhnqb@cid.csic.es; eva.balada@cid.csic.es; arnau.dominguez@iqac.csic.es; recgma@cid.csic.es; pilar.marco@iqac.csic.es;

<sup>2</sup> Centro de Investigación Biomédica en Red de Bioingeniería, Biomateriales y Nanomedicina (CIBER-BBN), Instituto de Salud Carlos III, Madrid, Spain;

<sup>3</sup> Instituto de Nanociencia y Materiales de Aragón (INMA), Consejo Superior de Investigaciones Científicas (CSIC), and University of Zaragoza, Zaragoza, Spain; carloscuestasayllon@gmail.com; vgrazu@unizar.es; jesusmartinezdelafuente@gmail.com

<sup>4</sup> Instituto de Microelectrónica de Barcelona (IMB-CNM). Consejo Superior de Investigaciones Científicas (CSIC), Campus UAB, Cerdanyola, 08193, Spain; Manuel.Gutierrez@imb-cnm.csic.es; antoni.baldi@imb-cnm.csic.es; Cesar.Fernandez@imb-cnm.csic.es;

<sup>5</sup> Department of Biochemistry and Physiology, School of Pharmacy and Food Sciences, University of Barcelona (UB), Barcelona, 08028, Spain; vnoe@ub.edu; ajife93@gmail.com; eva395@msn.com; simonasvaliuska@ub.edu; cciudad@ub.edu

<sup>6</sup> Instituto de Nanociencia y Nanotecnología (IN2UB), University of Barcelona (UB), Barcelona, 08028 Spain;

<sup>7</sup> Department of Chemical Engineering and Analytical Chemistry, University of Barcelona (UB), Barcelona, 08028, Spain; raimon\_gargallo@ub.edu;

\* Correspondence: recgma@cid.csic.es; Tel: +34-934006145; Fax: +34-932045904.

## INDEX

**Table S1.** Results of TFO target sequences search in the SARS-CoV-2 genome.

**Table S2.** Sequences of the PPRH and reporter probes (RP) used in this study

**Table S3.** Sequences of the oligonucleotides prepared in this work.

**Figure S1.** Binding of CC2\_DNA\_target with NH<sub>2</sub>-PPRH-CC2 and NH<sub>2</sub>-CC2 duplex

**Table S4.** Dissociation constants of PPRH-CC1, CC2, CC3 and PPRH-CC1-control and duplex-CC1, CC2 and CC3.

**Table S5.** Limit of detection values (LoD, expressed in nanomolar, nM) corresponding to the CC pairs calibration curves obtained in a multiplex assay, testing different Universal transport media (UTMs).

**Table S1.** Results of TFO target sequences search in the SARS-CoV-2 genome.

| Sequences (5'-3')        | Length | %GC  | Orientation | Position |
|--------------------------|--------|------|-------------|----------|
| AGATGAGGATGAAGAAGAAGGTGA | 24     | 41.7 | Forward     | 3031     |
| GAGCAGAAGGGTAGTAGAGAG    | 21     | 47.6 | Reverse     | 17128    |
| GTGATGAGGAACGAGAAGAGG    | 21     | 47.6 | Reverse     | 28823    |
| GAGGGAAGGACATAAGATGA     | 20     | 40.0 | Reverse     | 2470     |

**Table S2.** Sequences of the PPRH and reporter probes (RP) used in this study.

| Oligonucleotide | Sequence (5'-3')                               |
|-----------------|------------------------------------------------|
| PPRH-CC1        | GAGCAGAAGGGTAGTAGAGAGTTTGGAGAGATGATGGGAAGACGAG |
| PPRH-CC2        | GTGATGAGGAACGAGAAGAGGTTTGGAGAAGAGCAAGGAGTAGTG  |
| PPRH-CC3        | GAGGGAAGGACATAAGATGATTTTAGTAGAATACAGGAAGGGAG   |
| CC1-RP          | GGCCAATAGCAAAATGACTC                           |
| CC2-RP          | TGCGTAGAAGCCTTTTGGC                            |
| CC3-RP          | CCCTTCCACAAAATCAAC                             |

**Table S3.** Sequences of the oligonucleotides prepared in this work.**CC1 SYSTEM:**

CC1PPRH-amino

5'-NH<sub>2</sub>-TTTTTGAGCAGAAGGGTAGTAGAGAGTTTGGAGAGATGATGGGAAGACGAG-3'

CC1PPRH

5'-GAGCAGAAGGGTAGTAGAGAGTTTGGAGAGATGATGGGAAGACGAG-3'

CC1PPRH-Control (reverse Hoogsteen strand scrambled)

5'-GAGCAGAAGGGTAGTAGAGAGTTTGGAGAGCAGGAATAGAGGAGT-3'

CC1duplex-amino

5'-NH<sub>2</sub>-TTTTTGAGCAGAAGGGTAGTAGAGAG-3'

CC1biotineRP:

5'-GGCCAATAGCAAAATGACTC-BIOTINE-3'

CC1-TamraRP:

5'-GGCCAATAGCAAAATGACTC-Tamra-3'

CC1-Cy3RP:

5'-GGCCAATAGCAAAATGACTC-Cy3-3'

CC1-ThiolRP:

5'-GGCCAATAGCAAAATGACTC-Thiol-3'

CC1target:

5'-GAGTCATTTTGTATTGGCCTAGCTCTCTACTACCTTCTGCTC-3'

CC1DNAtarget-FAM

5'-FAM-GCTATTGGCCTAGCTCTCTACTACCTTCTGCTCGCATAGTGATATAC-3'

CC1RNAtarget-FAM

5'-FAM-CUAGCUCUCUACUACCCUUCUGCUCGCAUA-3'

CC1DNAtargetLarge-FAM

5' FAM-GGTAAGAGTCATTTTGCTATTGGCCTAGCTCTCTACTACCCTTCTGCTCGCATA 3'

## CC2 SYSTEM

CC2PPRH-amino:

5'-NH<sub>2</sub>-TTTTGTGATGAGGAACGAGAAGAGGTTTTGGAGAAGAGCAAGGAGTAGTG-3'

CC2PPRH:

5'-GTGATGAGGAACGAGAAGAGGTTTTGGAGAAGAGCAAGGAGTAGTG-3'

CC2duplex-amino:

5'-NH<sub>2</sub>-TTTTGTGATGAGGAACGAGAAGAGG-3'

CC2-biotineRP:

5'- TCGTAGAAGCCTTTTGGC-biotine-3'

CC2-Cy3RP:

5'- TCGTAGAAGCCTTTTGGC-Cy3-3'

CC2-ThiolRP:

5'- TCGTAGAAGCCTTTTGGC-thiol-3'

CC2-biotineRPNew:

5'-CCTTCTGCGTAGAAGCCTTT -biotine-3'

CC2DNATarget:

5'-GCCAAAAGGCTTCTACGCAGAAGGGAGCAGAGGCGGCAGTCAAGCCTCTTCTCGTTCCTCATCAC-3'

CC2NewTarget:

5'-AAAGGCTTCTACGCAGAAGGGAGCAGAGGCGGCAGTCAAGCCTCTTCTCGTTCCTCATCAC-3'

CC2DNAtarget-FAM

FAM-5'- TCAAGCCTCTTCTCGTTCCTCATCACGTAGT-3'

## CC3 SYSTEM

CC3PPRH-amino:

5'-NH<sub>2</sub>-TTTTGAGGGAAGGACATAAGATGATTTTAGTAGAATACAGGAAGGGAG-3'

CC3PPRH:

5'-GAGGGAAGGACATAAGATGATTTTAGTAGAATACAGGAAGGGAG-3'

CC3duplex-amino:

5'-NH<sub>2</sub>-TTTTGAGGGAAGGACATAAGATGA-3'

CC3-biotineRPnew1:

5'-CCCTTTCCACAAAAATCAAC-BIOTINE-3'

CC3-biotineRP:

5'- CCCTTTCCACAAAAATCAAC-biotine-3'

CC3-Cy3RP:

5'- CCCTTTCCACAAAAATCAAC-Cy3-3'

CC3-thiolRP:

5'- CCCTTTCCACAAAAATCAAC-thiol-3'

CC3DNATarget:

5'-GTTGATTTTGTGGAAAGGGCTATCATCTTATGTCCTTCCCTC-3'

CC3DNAtarget-FAM

FAM-5'-GTGGAAAGGGCTATCATCTTATGTCCTTCCCTCAGTCAGCACCTCAT-3'

CC3RNAtarget-FAM

FAM-5'-GGCUAUCUUAUGUCCUCCUCAGUCA-3'

**Figure S1.** Binding of CC2-DNA-target with NH<sub>2</sub>-PPRH-CC2 and NH<sub>2</sub>-CC2duplex

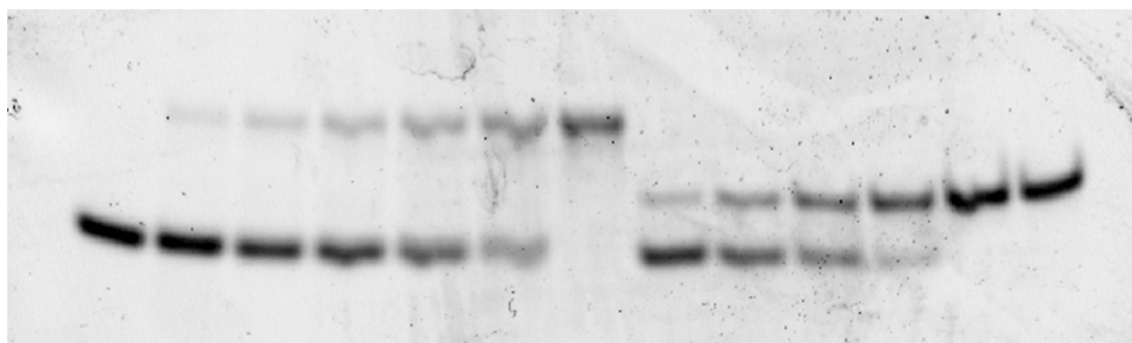

$$K_d \text{ PPRH} = 6.04 \cdot 10^{-7} \text{ M}$$

$$K_d \text{ duplex} = 7.47 \cdot 10^{-7} \text{ M}$$

**Table S4.** Dissociation constants of PPRH-CC1, CC2, CC3 and PPRH-CC1-control and duplex-CC1, CC2 and CC3.

| Oligonucleotide              | $K_d (10^{-7}), \text{ M}$ |
|------------------------------|----------------------------|
| PPRH-CC1 <sup>#</sup>        | 3.88                       |
| Duplex-CC1 <sup>#</sup>      | 4.79                       |
| PPRH-CC2 <sup>&amp;</sup>    | 6.04                       |
| Duplex-CC2 <sup>&amp;</sup>  | 7.47                       |
| PPRH-CC3 <sup>*</sup>        | 3.86                       |
| Duplex-CC3 <sup>*</sup>      | 10.5                       |
| PPRH-CC1Control <sup>#</sup> | 6.24                       |

<sup>#</sup>Target oligonucleotide used: CC1DNAtargetLarge-FAM;

<sup>&</sup>Target oligonucleotide used: CC2DNAtarget-FAM;

<sup>\*</sup>Target oligonucleotide used: CC3DNAtarget-FAM;

**Table S5.** Limit of detection values (LoD, expressed in nanomolar, nM) corresponding to the CC pairs calibration curves obtained in a multiplex assay. The table shows the data obtained when diluting the corresponding targets in different Universal Transport media (UTMs 1-3) compared with the values achieved when using hybridization buffer. In this case, the first oligonucleotides (PPRH and duplex format) were printed on the glass slide at a concentration of 125 nM. Subsequently, serial target dilutions were added (ranging from 500 nM to 0 with a dilution factor of 5). Finally, the labelled second oligonucleotides were added at an optimized concentration of 250 nM.

| Buffer/UTM           | CC1  |        | CC2  |        | CC3  |        |
|----------------------|------|--------|------|--------|------|--------|
|                      | PPRH | Duplex | PPRH | Duplex | PPRH | Duplex |
| Hybridization buffer | 1.01 | 0.64   | 3.16 | 4.67   | 1.56 | 3.49   |
| UTM 1                | 0.47 | 0.61   | 2.53 | 2.60   | 2.58 | 3.76   |
| UTM 2                | 0.01 | 0.06   | 2.03 | 1.23   | 0.72 | 0.33   |
| UTM 3                | 0.03 | 0.02   | 0.89 | 0.71   | 1.50 | 1.17   |
